# Supplementary material for: Magnetic fluidized bed for solid phase extraction in microfluidic systems
Source: Royal Society of Chemistry journal article supplement (doi:10.1039/c7lc00063d), 2017-01-01
Supplement: c7lc00063d1.zip [file c7lc00063d1.zip]

Supplementary Video 1

Opening and closing process of a 50 µg fluidized bed at 1 mBar/s for a 0-40 mBar range. The bed opens at a pressure of effective fluidization of 23 mBars. Once in the fluidized state it will close when reaching the pressure of minimum fluidization of 15 mBar, at which point it starts compacting.
